# Supplementary material for: High CLEC-2 expression associates with unfavorable postoperative prognosis of patients with clear cell renal cell carcinoma
Source: PubMed Central journal article supplement (PMC5325393; doi:10.18632/oncotarget.11606), 2016-08-25
Supplement: oncotarget-07-63661-s001.pdf [file oncotarget-07-63661-s001.pdf]

## High CLEC-2 expression associates with unfavorable postoperative prognosis of patients with clear cell renal cell carcinoma

### Supplementary Materials

**Table S1: Clinical characteristics of patients according to CLEC-2 positive cell infiltration**

| Characteristics      | Patients      |      | CLEC-2 positive cell infiltration |               | P-value |
|----------------------|---------------|------|-----------------------------------|---------------|---------|
|                      | n             | %    | low                               | high          |         |
| All patients         | 277           | 100  | 137                               | 140           |         |
| Age, years           |               |      |                                   |               | 0.875*  |
| mean ± SD            | 55.71 ± 12.66 |      | 55.83 ± 13.04                     | 55.59 ± 12.31 |         |
| Gender               |               |      |                                   |               | 0.519†  |
| Female               | 86            | 31   | 40                                | 46            |         |
| Male                 | 191           | 69   | 97                                | 94            |         |
| Tumor size, cm       |               |      |                                   |               | 0.015*  |
| mean ± SD            | 4.71 ± 2.56   |      | 4.34 ± 2.06                       | 5.08 ± 2.92   |         |
| Pathological T stage |               |      |                                   |               | 0.042‡  |
| pT1                  | 173           | 62.5 | 96                                | 77            |         |
| pT2                  | 27            | 9.7  | 7                                 | 20            |         |
| pT3                  | 73            | 26.4 | 33                                | 40            |         |
| pT4                  | 4             | 1.4  | 1                                 | 3             |         |
| Pathological N stage |               |      |                                   |               | 0.988†  |
| pN0                  | 275           | 99.3 | 136                               | 139           |         |
| pN1                  | 2             | 0.7  | 1                                 | 1             |         |
| Distant metastasis   |               |      |                                   |               | 0.109†  |
| No                   | 262           | 94.6 | 133                               | 129           |         |
| Yes                  | 15            | 5.4  | 4                                 | 11            |         |
| TNM stage            |               |      |                                   |               | 0.016‡  |
| I                    | 168           | 60.6 | 94                                | 74            |         |
| II                   | 23            | 8.3  | 6                                 | 17            |         |
| III                  | 67            | 24.2 | 32                                | 35            |         |
| IV                   | 19            | 6.9  | 5                                 | 14            |         |
| Fuhrman grade        |               |      |                                   |               | 0.203‡  |
| 1                    | 30            | 10.8 | 16                                | 14            |         |
| 2                    | 203           | 73.3 | 99                                | 104           |         |
| 3                    | 41            | 14.8 | 19                                | 22            |         |
| 4                    | 3             | 1.1  | 3                                 | 0             |         |
| Necrosis             |               |      |                                   |               | 0.038†  |
| Absent               | 241           | 87.0 | 125                               | 116           |         |
| Present              | 36            | 13.0 | 12                                | 24            |         |
| ECOG PS              |               |      |                                   |               | 0.505†  |
| 0                    | 200           | 72.2 | 100                               | 100           |         |
| 1                    | 62            | 22.4 | 31                                | 31            |         |
| 2                    | 11            | 4.0  | 5                                 | 6             |         |
| 3                    | 4             | 1.4  | 1                                 | 3             |         |
| UISS category        |               |      |                                   |               | 0.143‡  |
| low risk             | 115           | 41.5 | 62                                | 53            |         |
| mediate risk         | 124           | 44.8 | 59                                | 65            |         |
| high risk            | 38            | 13.7 | 16                                | 22            |         |
| SSIGN category       |               |      |                                   |               | 0.153‡  |
| 0–3                  | 215           | 77.6 | 110                               | 105           |         |
| 4–7                  | 56            | 22.2 | 26                                | 30            |         |
| 8+                   | 6             | 2.2  | 1                                 | 5             |         |

\*t-test for continuous variables, † $\chi^2$  test or Fisher's exact test, ‡Cochran-Mantel-Haenszel  $\chi^2$  test, P-value < 0.05 was regarded as statistically significant; ECOG PS=Eastern Cooperative Oncology Group performance status.

**Table S2: Univariate analyses of characteristics associated with overall survival and recurrence free survival**

| Variables                         | OS (n = 277) |              |                      | RFS (n = 254) |              |                      |
|-----------------------------------|--------------|--------------|----------------------|---------------|--------------|----------------------|
|                                   | Hazard Ratio | 95%CI        | P-value <sup>†</sup> | Hazard Ratio  | 95%CI        | P-value <sup>†</sup> |
| Age, years                        | 1.031        | 1.012–1.050  | < 0.001              | 1.205         | 1.006–1.046  | 0.011                |
| Gender                            |              |              | 0.953                |               |              | 0.956                |
| Male vs Female                    | 0.953        | 0.590–1.593  |                      | 0.956         | 0.594–1.636  |                      |
| Tumor size                        | 1.195        | 1.110–1.288  | < 0.001              | 1.195         | 1.101–1.298  | < 0.001              |
| Pathological T stage              |              |              | < 0.001              |               |              | < 0.001              |
| pT1                               | 1.000        | Reference    |                      | 1.000         | Reference    |                      |
| pT2                               | 3.526        | 1.837–6.767  | < 0.001              | 3.506         | 1.705–7.210  | 0.001                |
| pT3                               | 3.269        | 1.992–5.366  | < 0.001              | 2.923         | 1.720–1.720  | < 0.001              |
| pT4                               | 7.923        | 2.404–26.113 | 0.001                | 14.854        | 5.110–43.178 | < 0.001              |
| N classification                  |              |              |                      |               |              |                      |
| N1 vs N0                          | 1.336        | 0.175–10.189 | 0.780                |               |              |                      |
| Distant metastasis                |              |              |                      |               |              |                      |
| Yes vs No                         | 6.322        | 3.412–11.716 | < 0.001              |               |              |                      |
| TNM stage                         |              |              | <0.001               |               |              | <0.001               |
| I                                 | 1.000        | Reference    |                      | 1.000         | Reference    |                      |
| II                                | 3.317        | 1.589–6.885  | < 0.001              | 3.755         | 1.871–7.536  | < 0.001              |
| III                               | 3.360        | 1.968–5.736  | < 0.001              | 2.729         | 1.588–4.690  | < 0.001              |
| IV                                | 10.791       | 5.695–20.446 | < 0.001              | 14.914        | 7.044–49.419 | < 0.001              |
| Fuhrman grade                     |              |              | < 0.001              |               |              | < 0.001              |
| 1                                 | 1.000        | Reference    |                      | 1.000         | Reference    |                      |
| 2                                 | 1.913        | 0.689–5.306  | 0.213                | 1.344         | 0.531–3.405  | 0.533                |
| 3                                 | 6.156        | 2.132–17.779 | 0.001                | 4.762         | 1.784–12.708 | 0.002                |
| 4                                 | 7.941        | 1.775–35.520 | 0.007                | 6.336         | 1.511–26.563 | 0.012                |
| Necrosis                          |              |              |                      |               |              |                      |
| Present vs Absent                 | 2.709        | 1.629–4.504  | < 0.001              | 3.006         | 1.754–5.152  | < 0.001              |
| ECOG PS                           |              |              | < 0.001              |               |              | < 0.001              |
| 0                                 | 1.000        | Reference    |                      | 1.000         | Reference    |                      |
| 1                                 | 3.307        | 2.064–5.299  | < 0.001              | 2.767         | 1.642–4.664  | < 0.001              |
| 2                                 | 3.999        | 1.689–9.471  | 0.002                | 4.703         | 1.845–11.988 | 0.001                |
| 3                                 | 5.370        | 1.652–17.456 | 0.005                | 8.234         | 2.907–23.325 | < 0.001              |
| CLEC-2 positive cells             | 1.005        | 1.002–1.007  | < 0.001              | 1.004         | 1.002–1.007  | 0.001                |
| CLEC-2 positive cell infiltration |              |              | 0.001                |               |              | 0.002                |
| High vs Low                       | 2.278        | 1.430–3.627  |                      | 2.154         | 1.318–3.520  |                      |

ECOG PS= Eastern Cooperative Oncology Group performance status; CI=confidence interval; OS= overall survival; RFS = recurrence free survival; <sup>†</sup>Data obtained from the Cox proportional hazards model, P-value < 0.05 was regarded as statistically significant.
